# Supplementary material for: Bacterial Communities of Ixodes scapularis from Central Pennsylvania, USA
Source: MDPI journal article supplement (doi:10.3390/insects11100718), 2020-10-20
Supplement: s1 [file s1]

# Mean bacterial titer

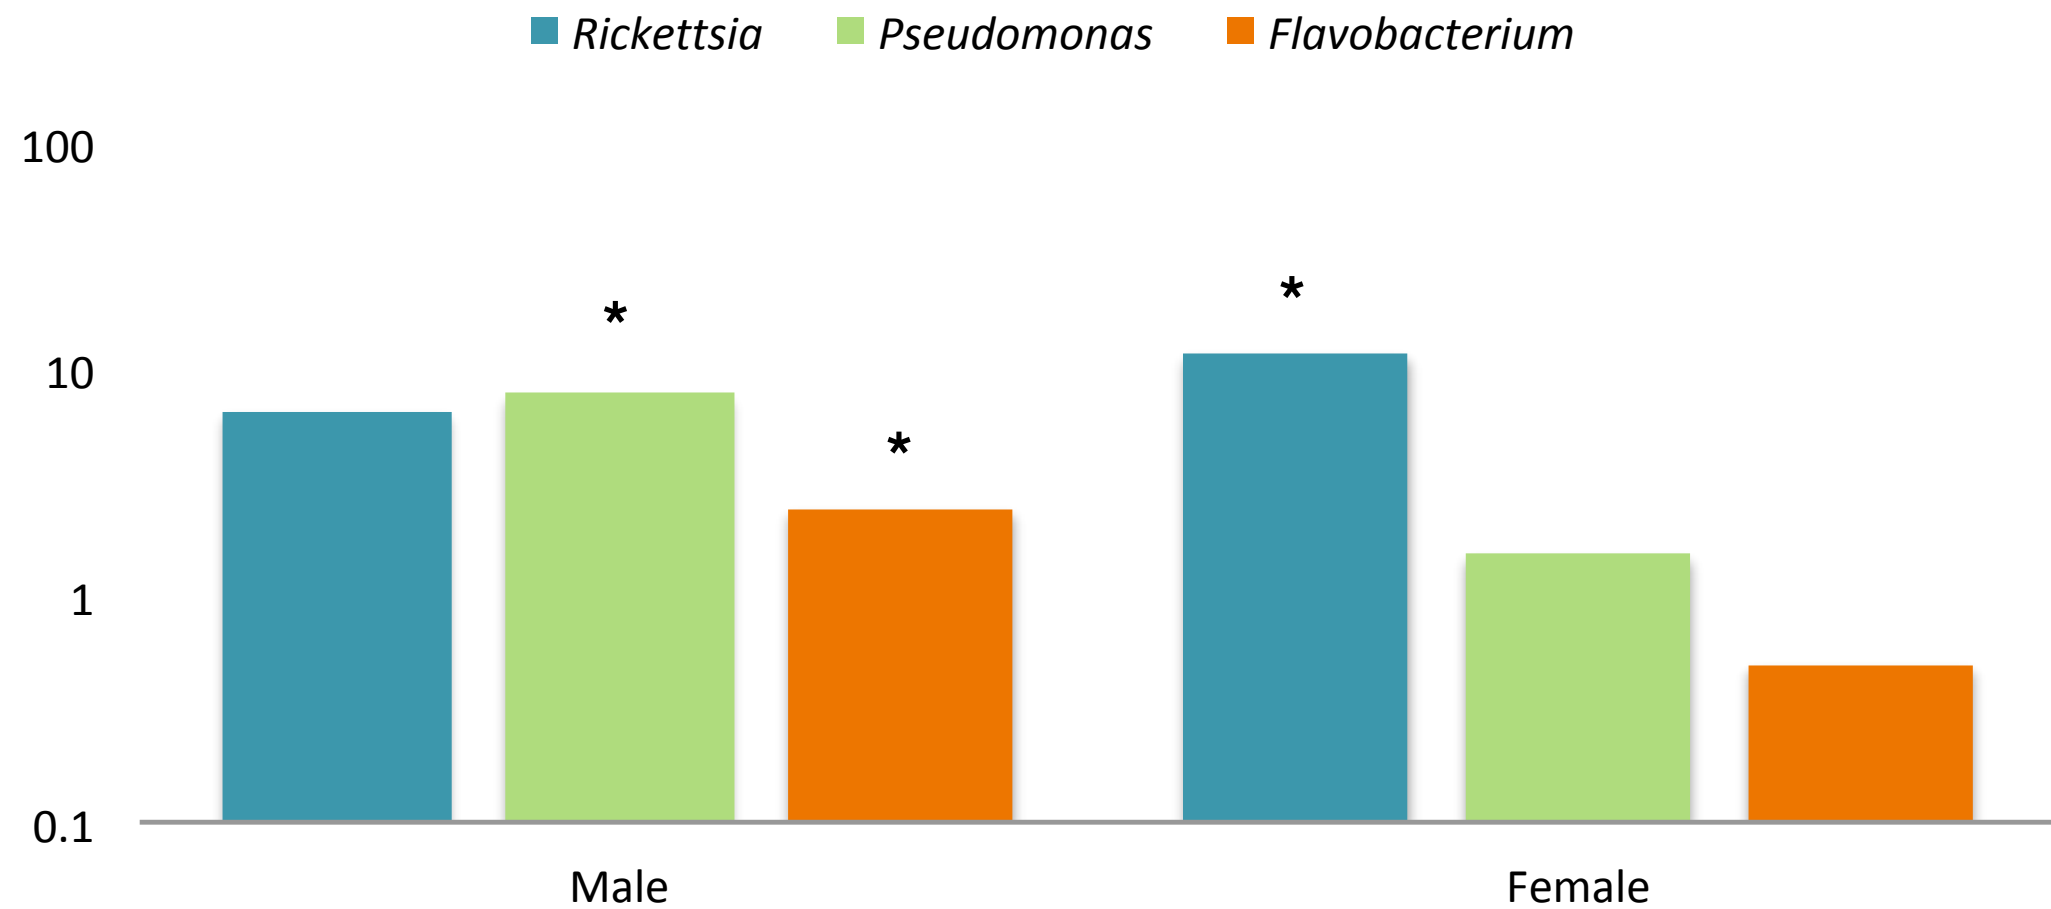

*Rickettsia*: Mann Whitney U= 87.5, z-score = 4.66816, p-value < .00001.

*Pseudomonas*: Mann Whitney U= 116.5, z-score = -4.15146, p-value < .00001.

*Flavobacterium*: Mann Whitney U= 113.5, z-score = -4.20491, p-value < .00001.
