# Supplementary figures and images for: Bacterial Communities of Ixodes scapularis from Central Pennsylvania, USA
Source: MDPI journal article supplement (doi:10.3390/insects11100718), 2020-10-20

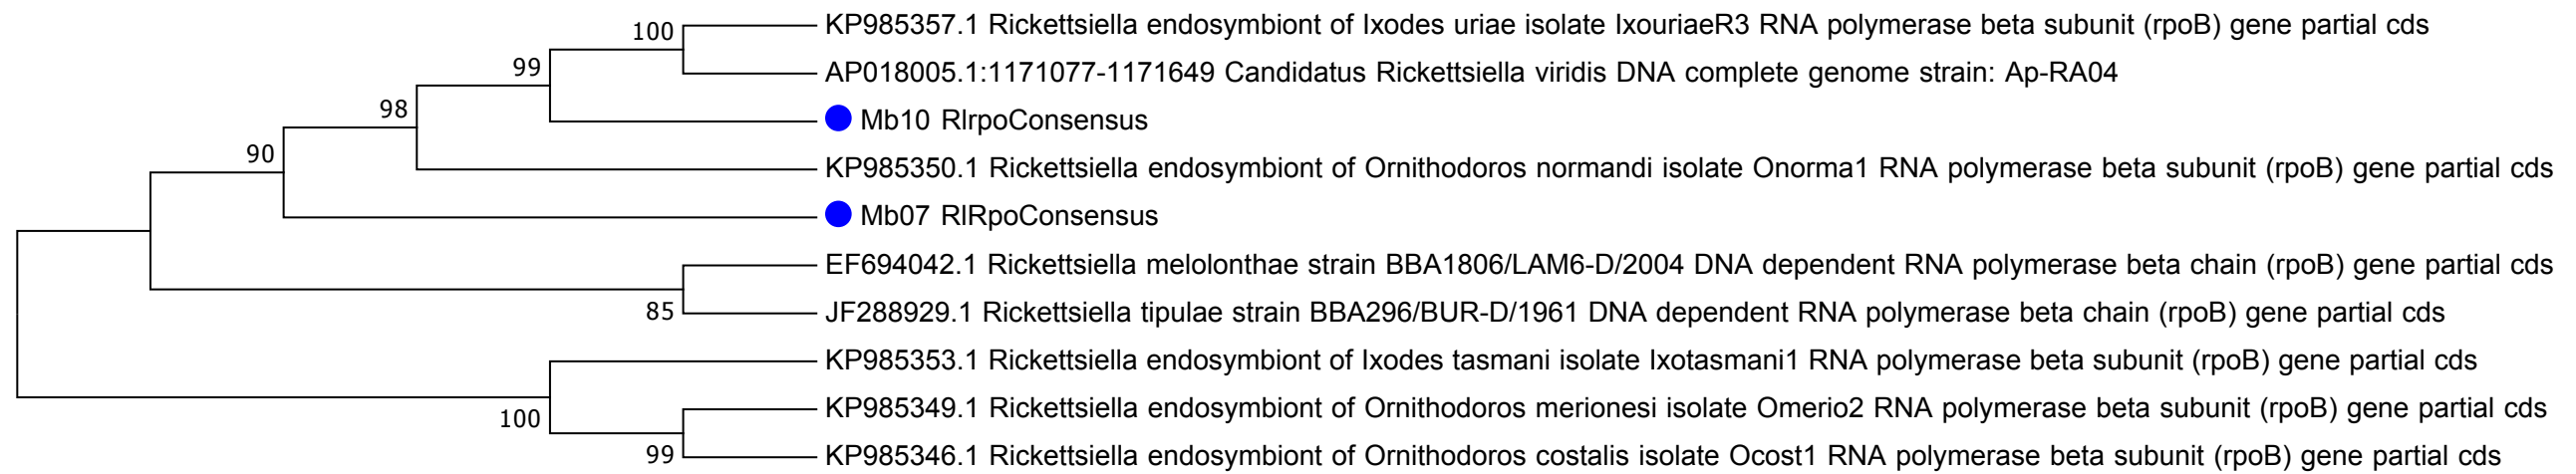

Supplement: s1 [file s1]

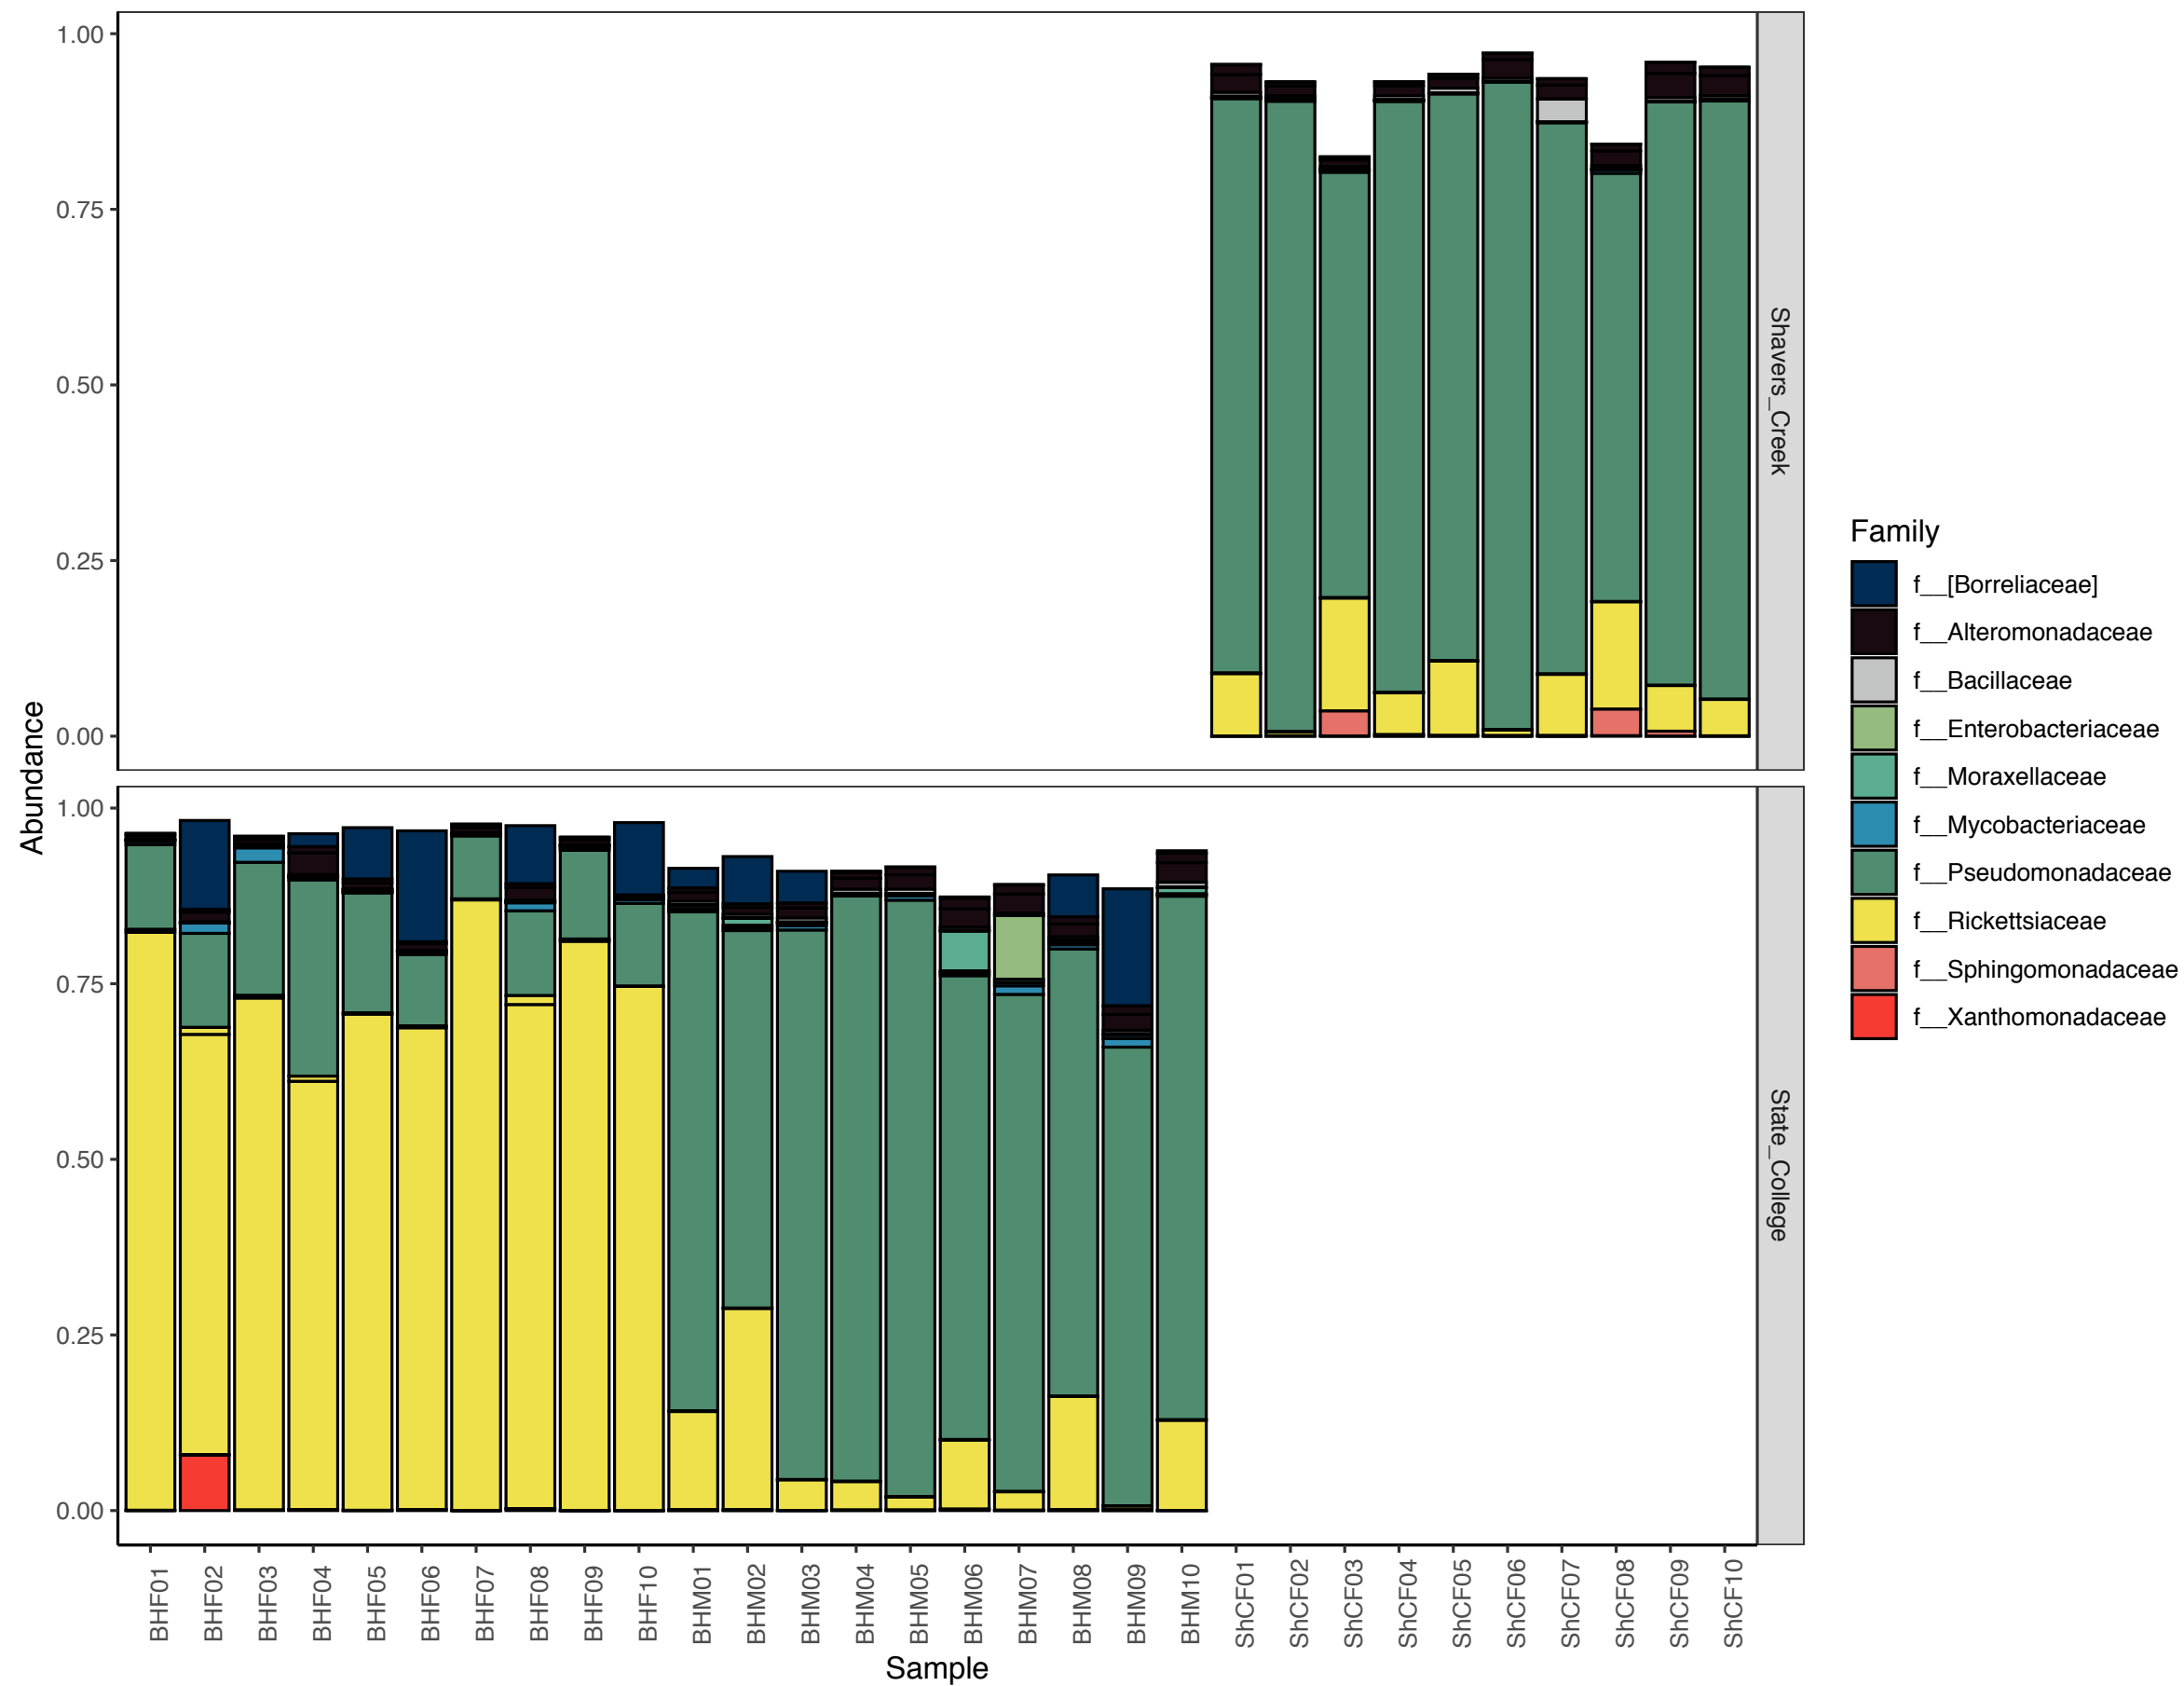

Supplement: s1 [file s1]

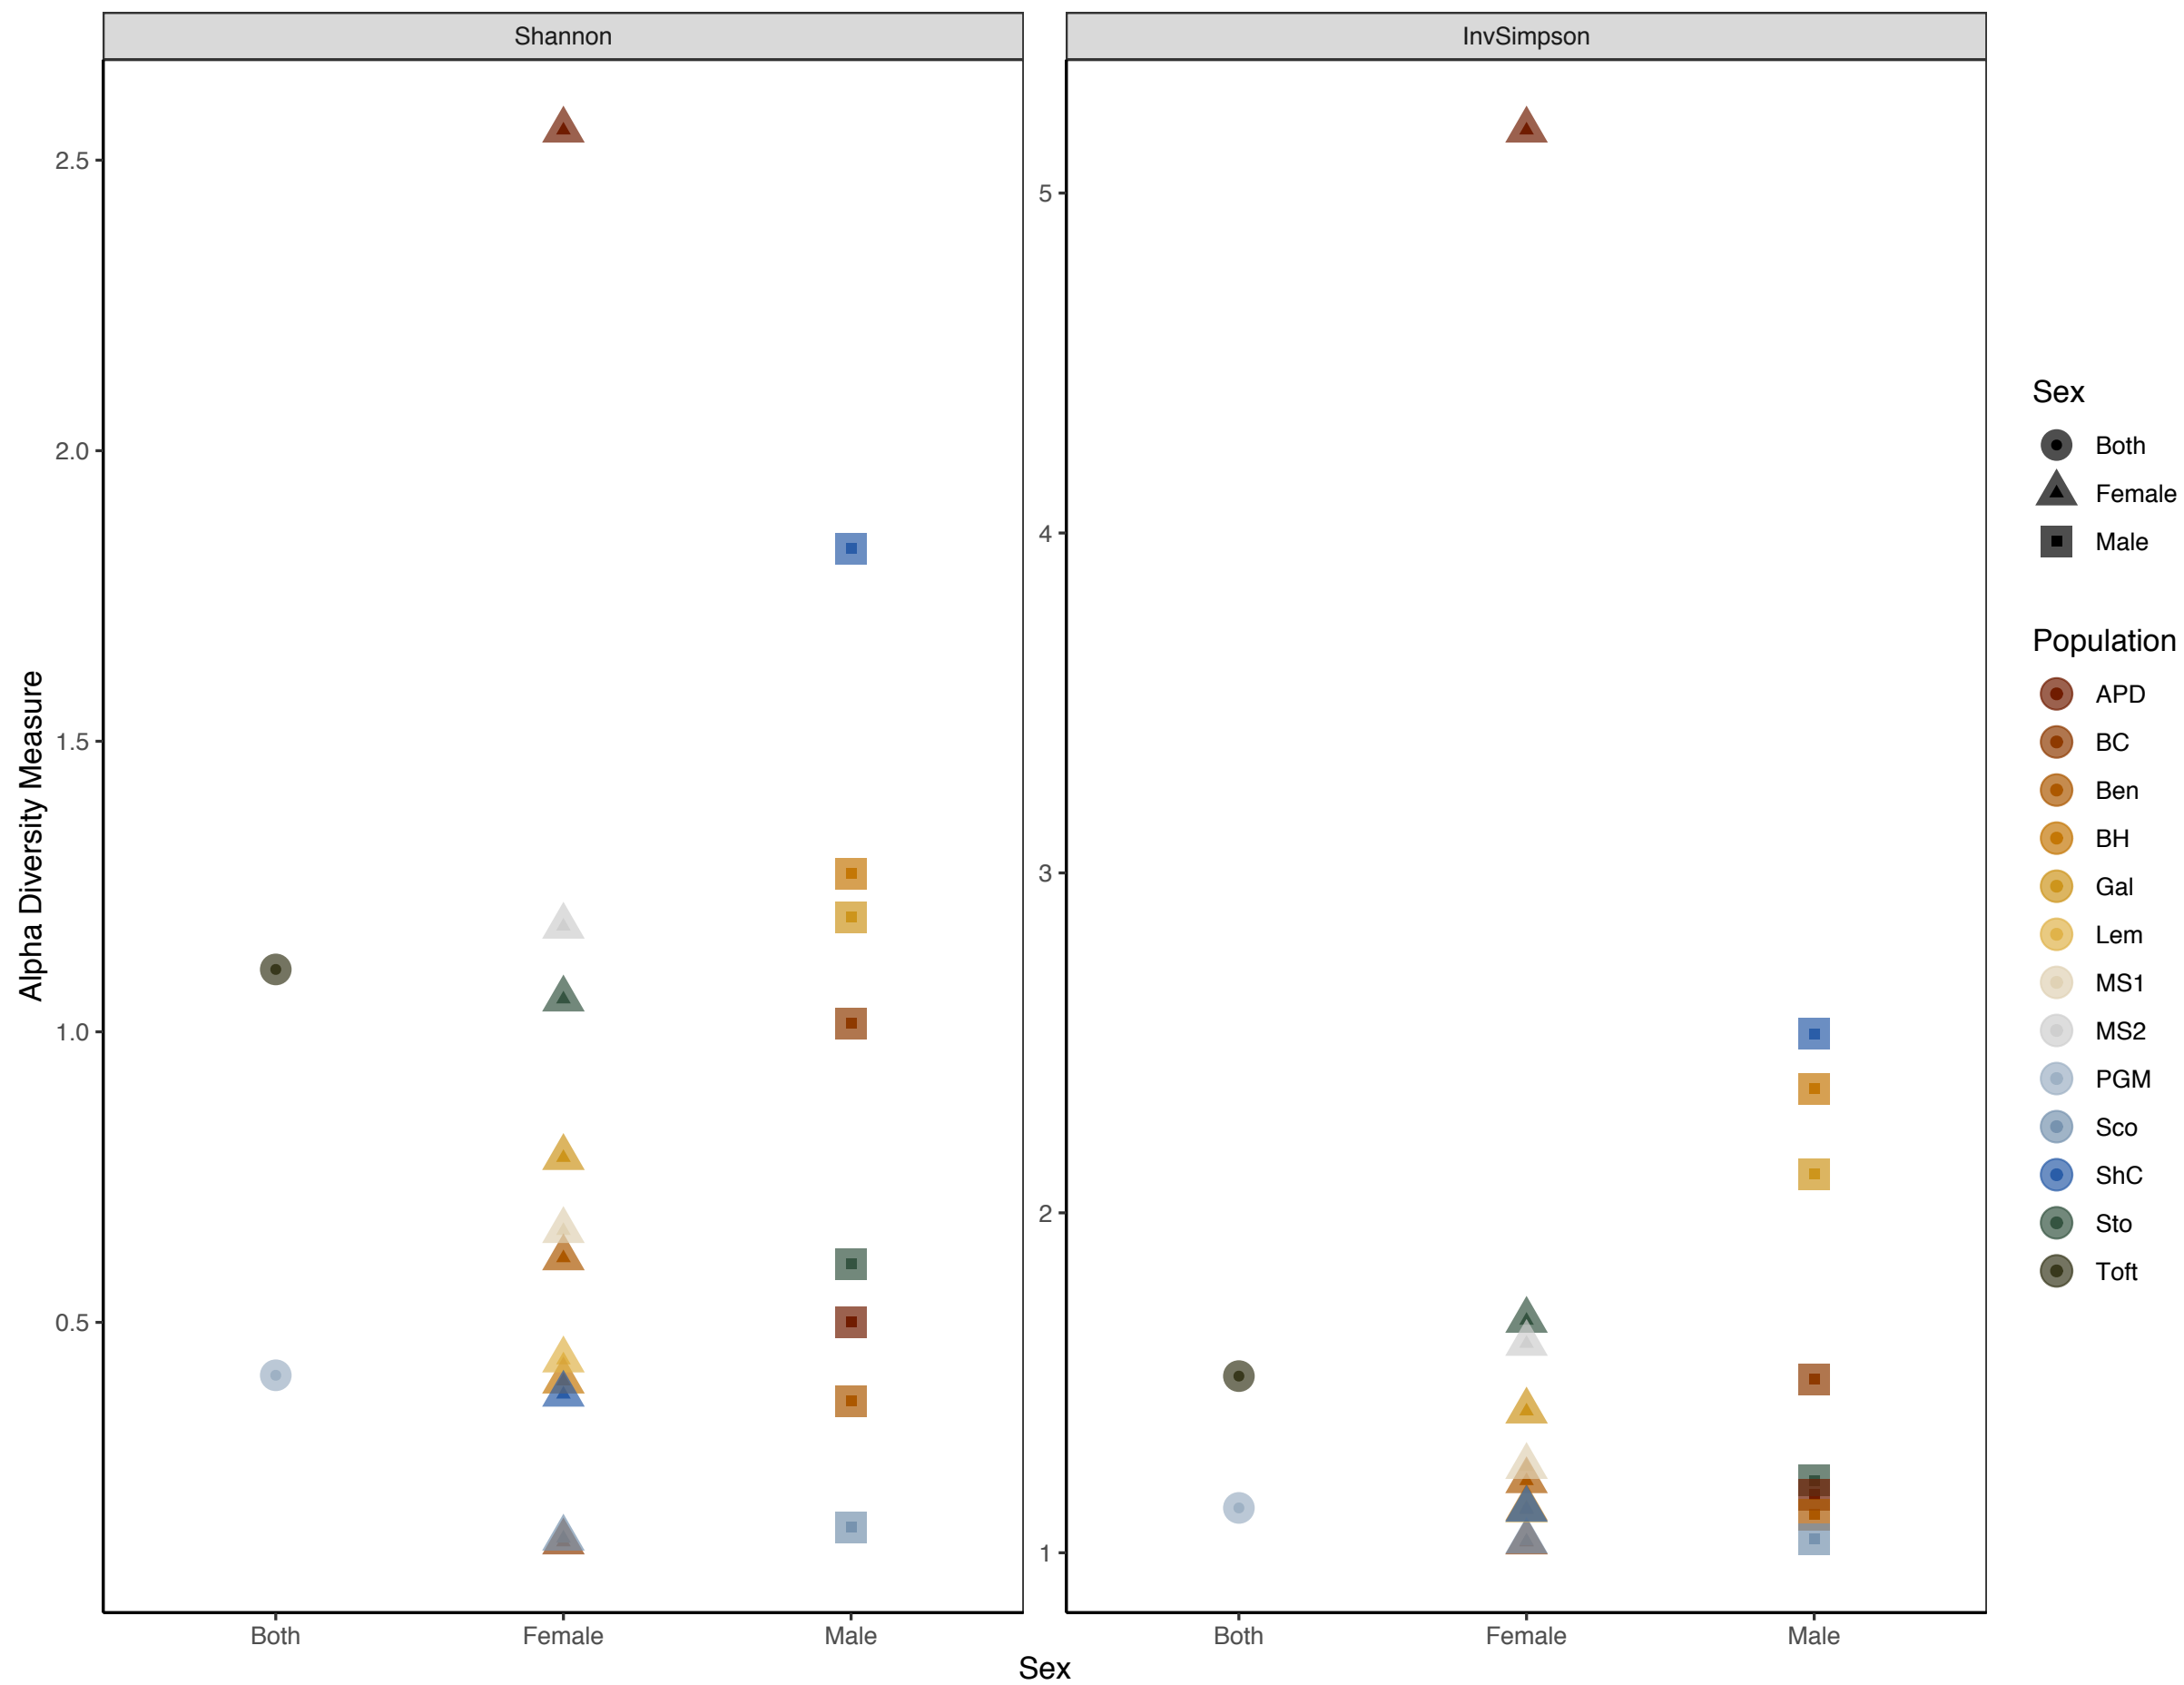

Supplement: s1 [file s1]

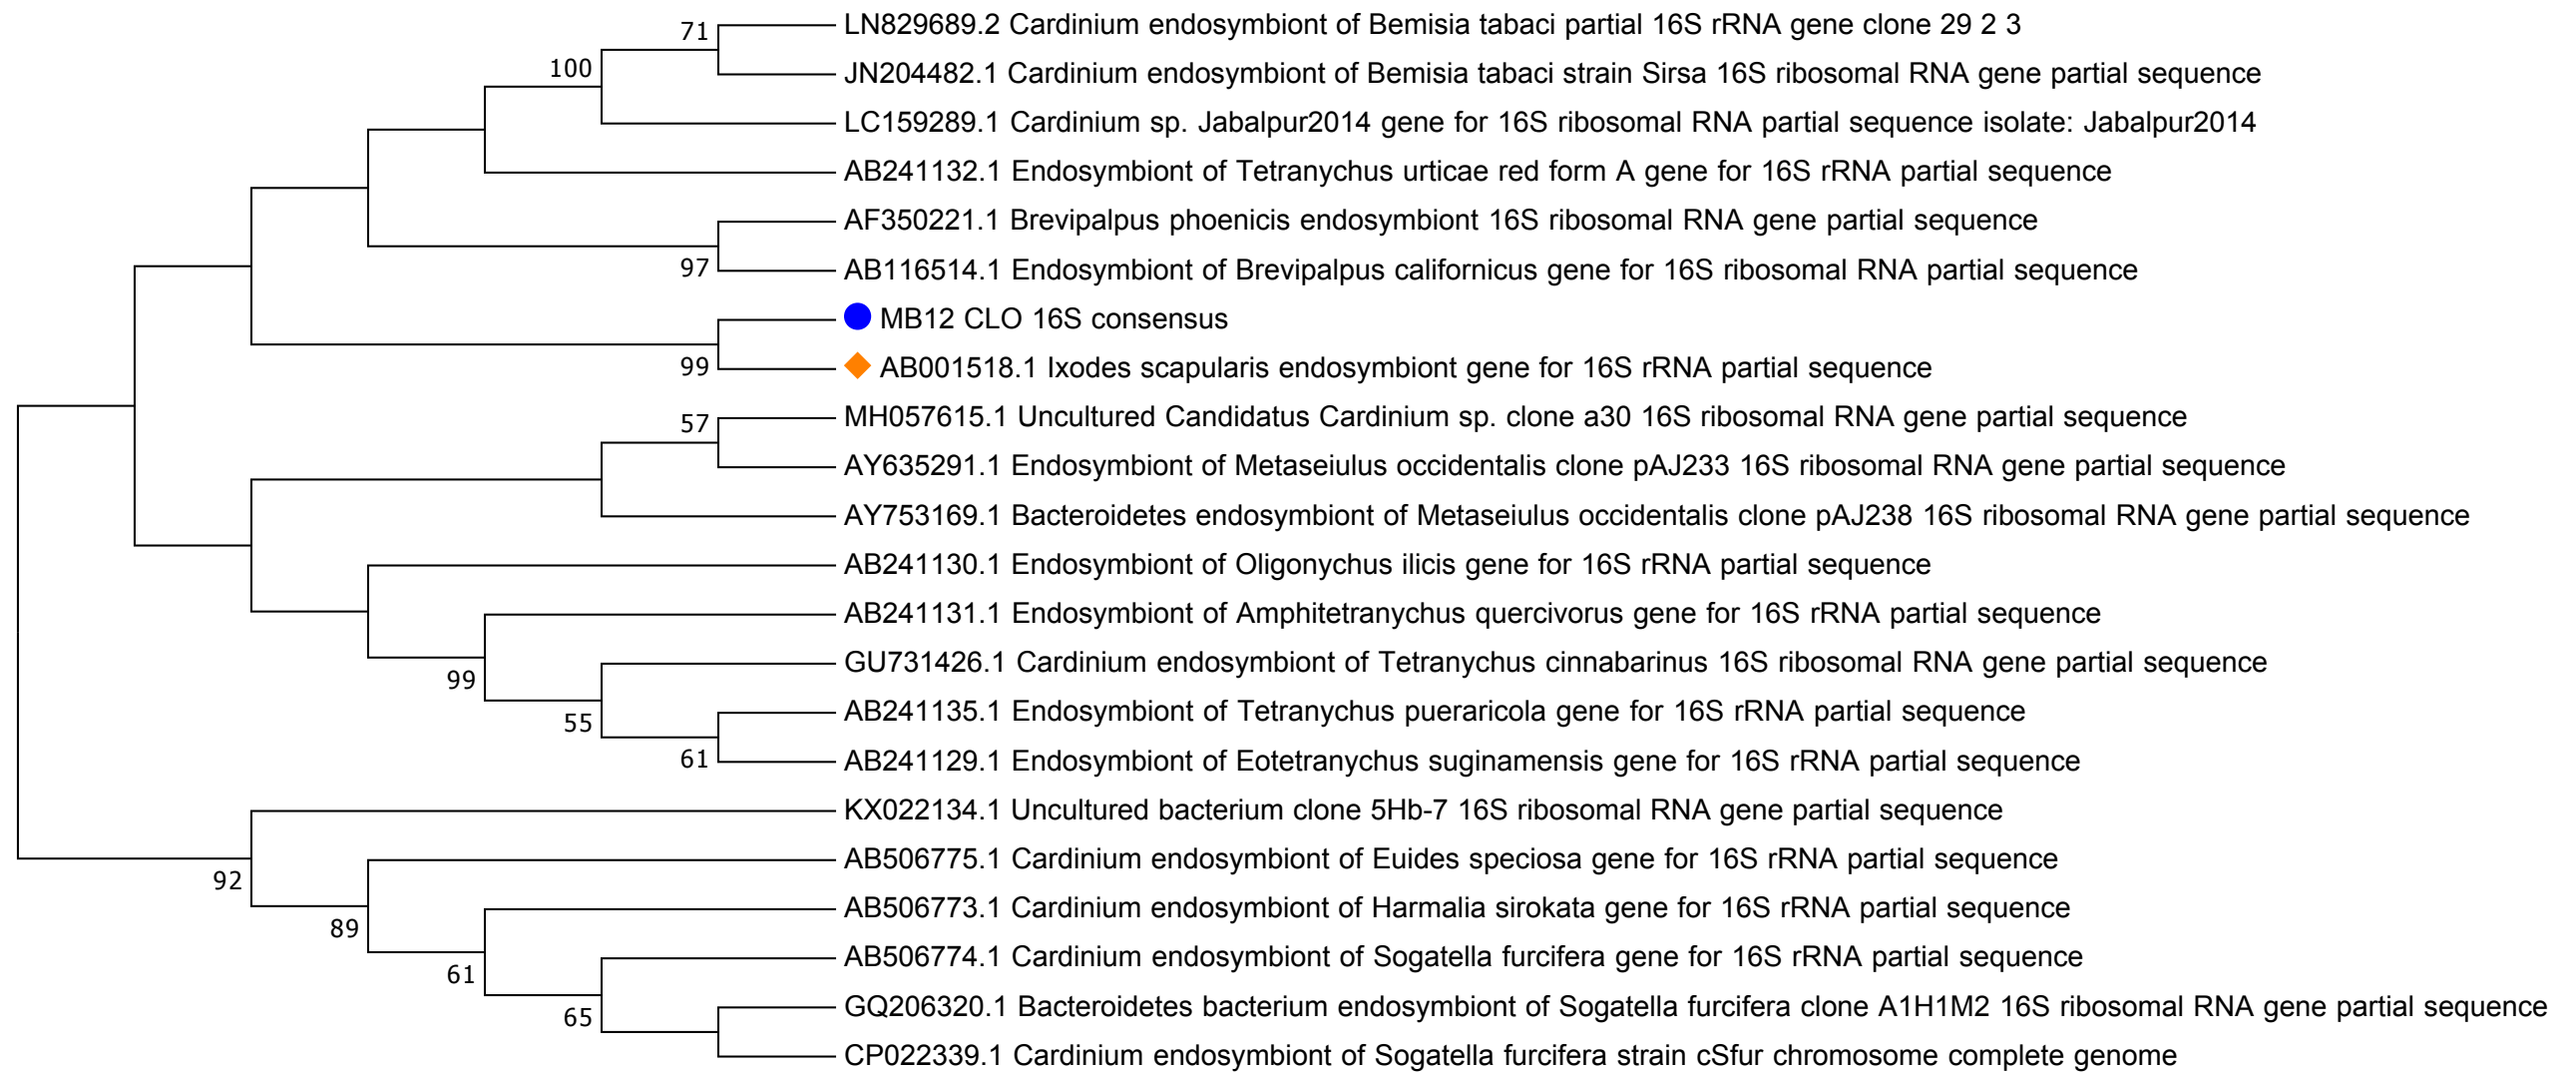

Supplement: s1 [file s1]

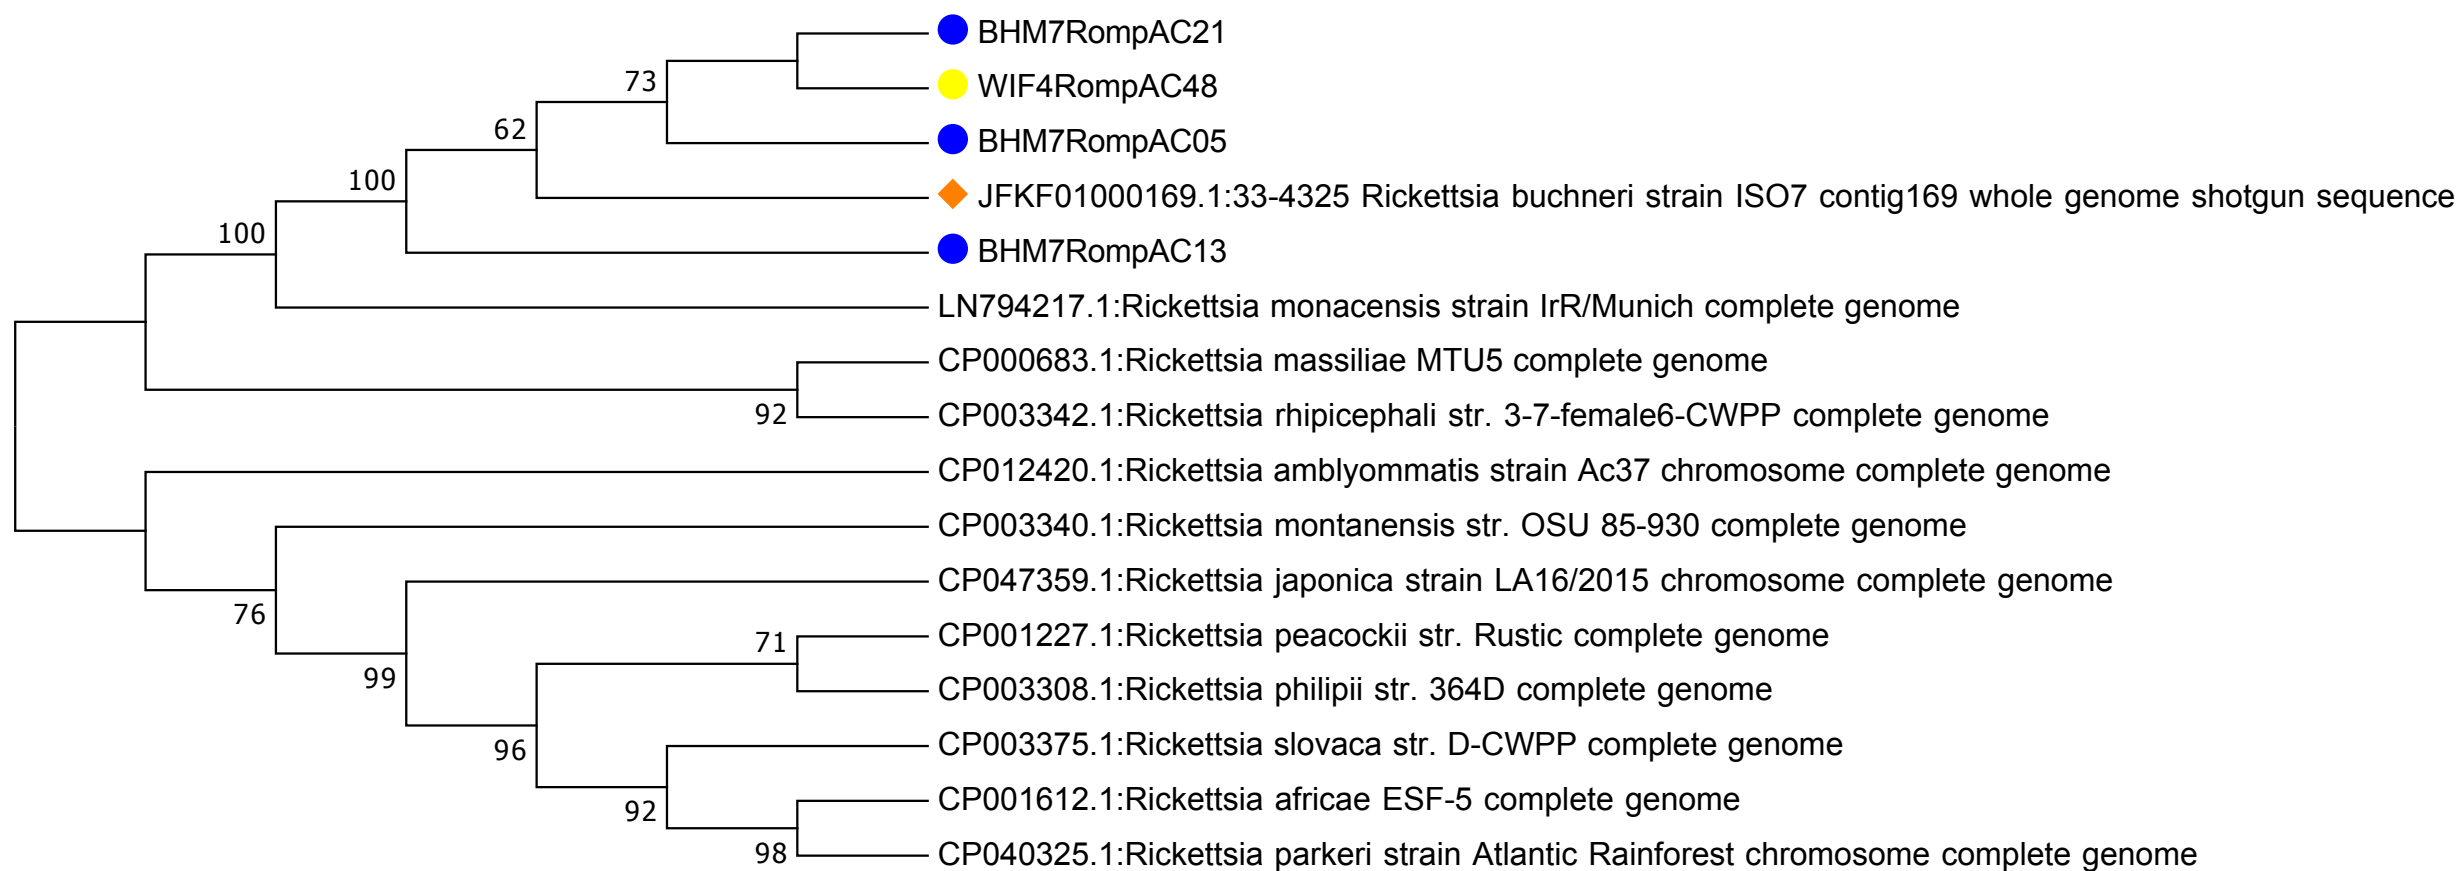

Supplement: s1 [file s1]

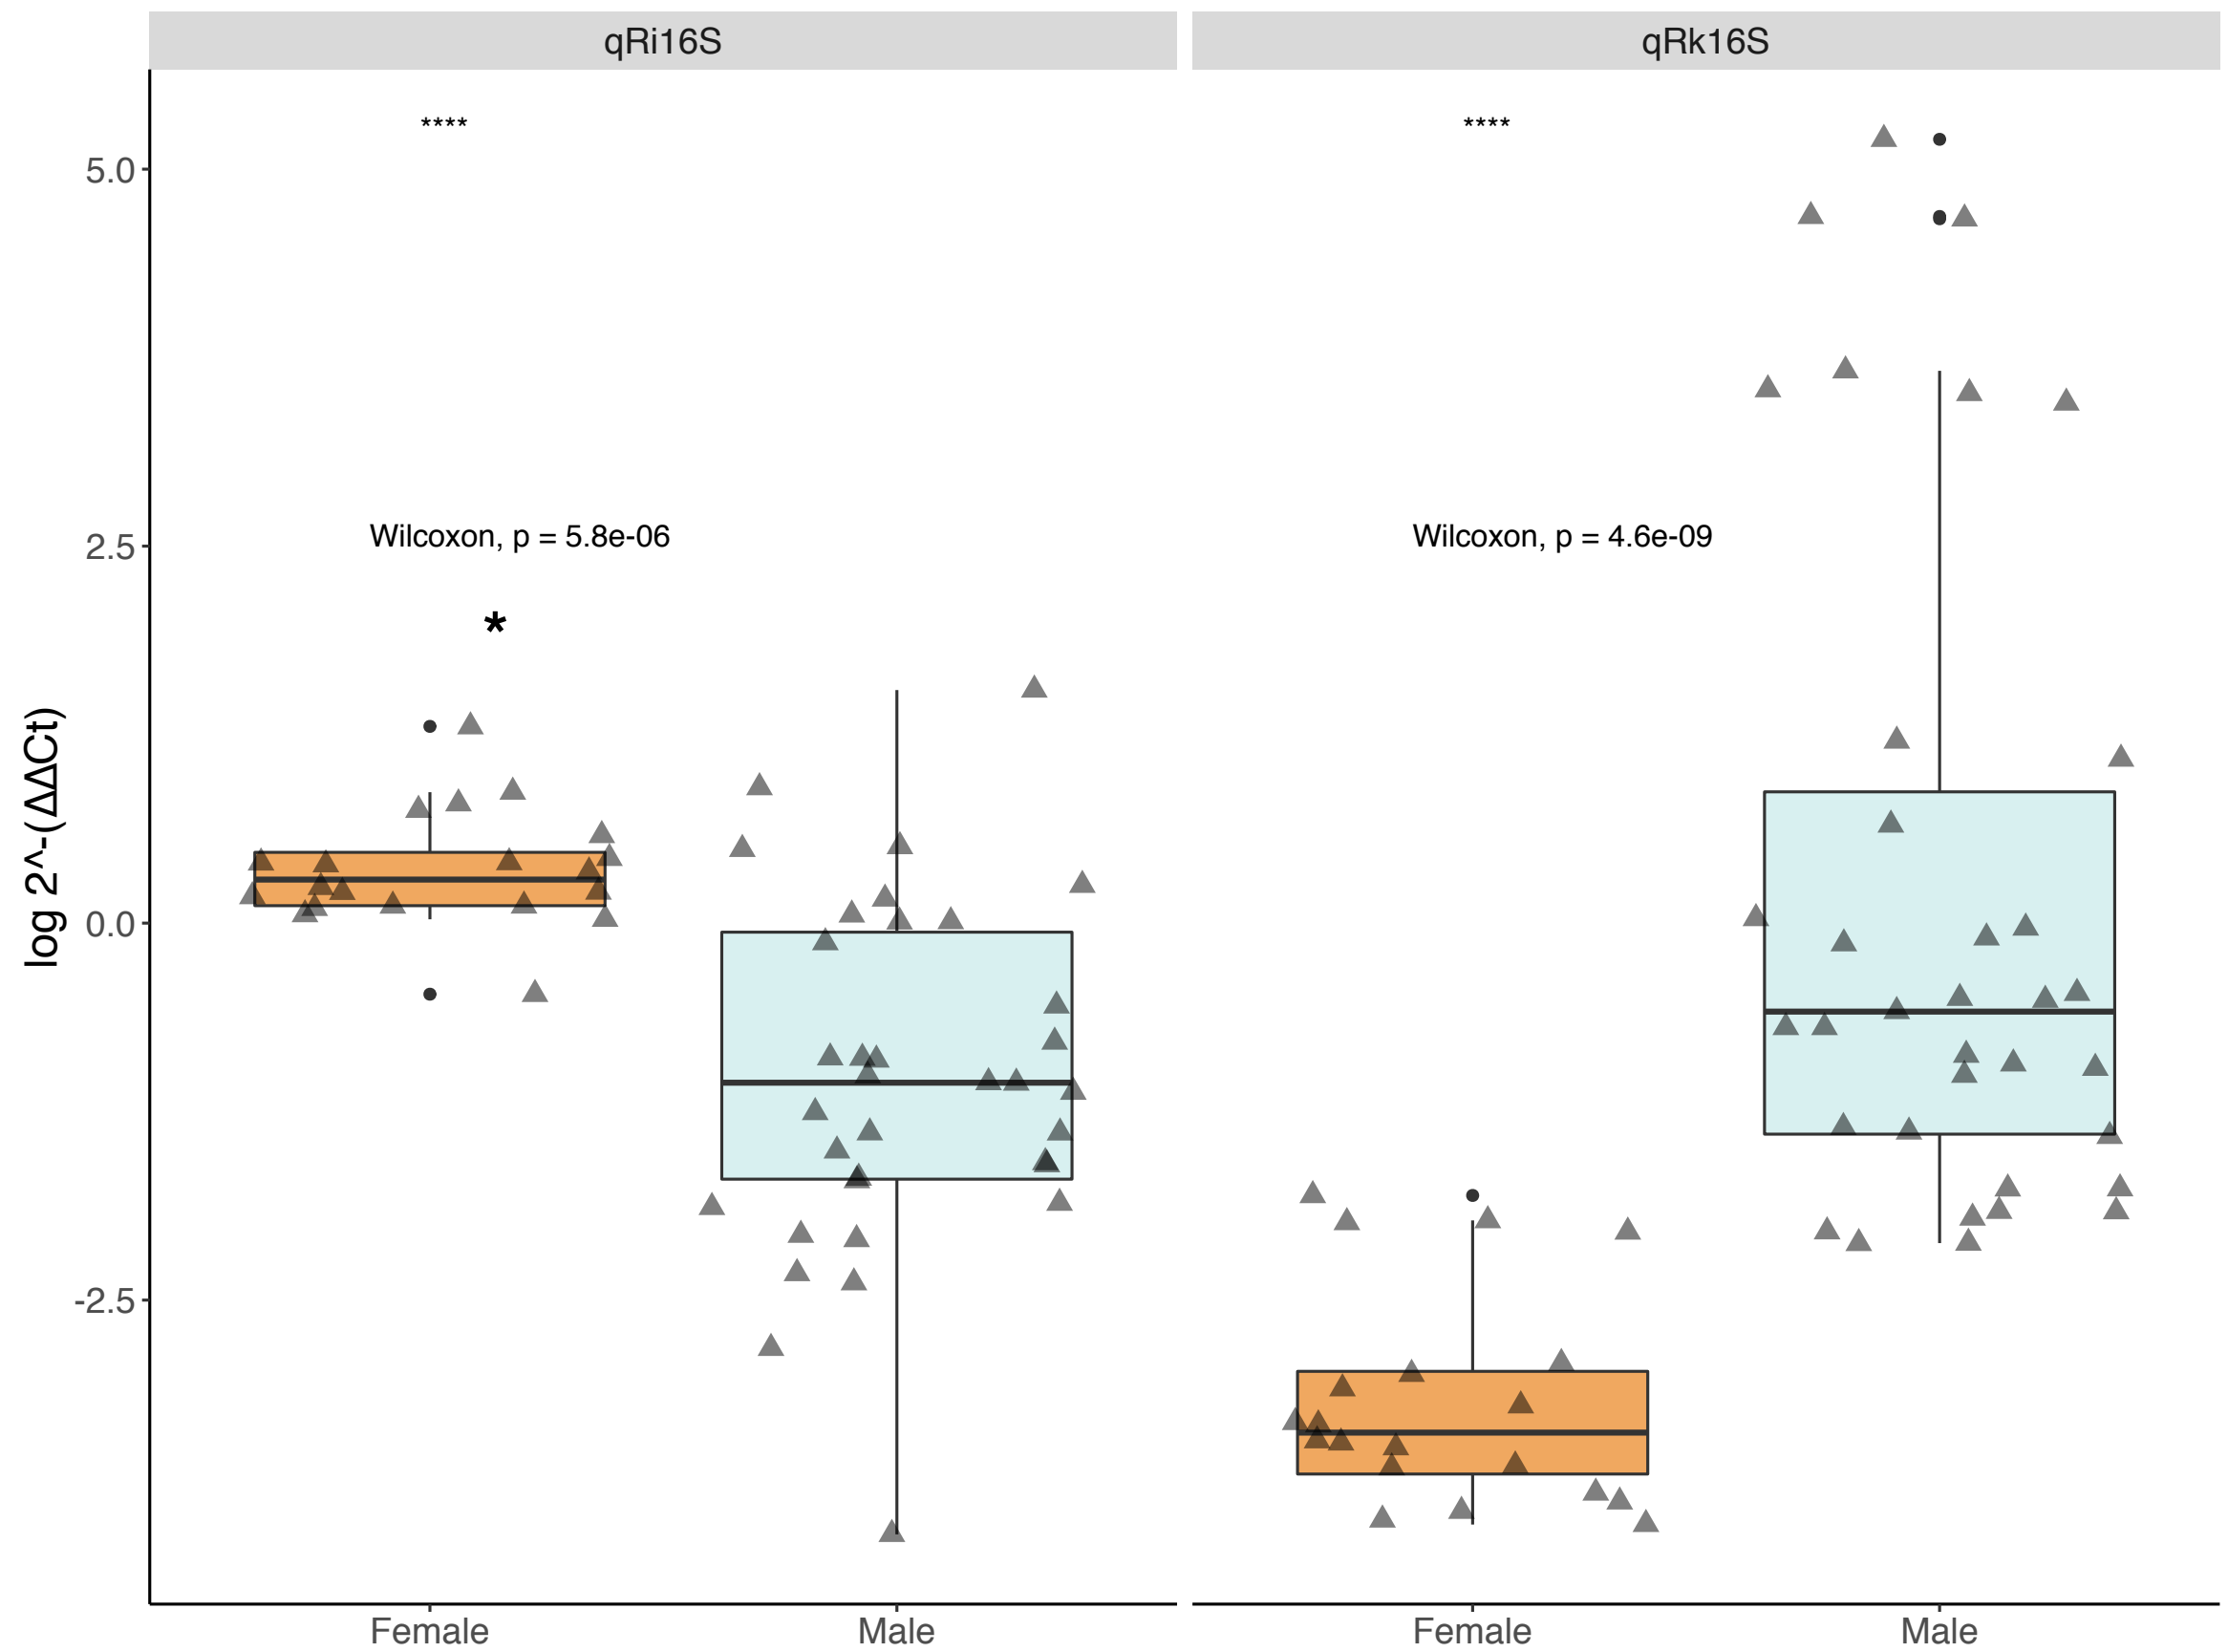

Supplement: s1 [file s1]
